# Supplementary material for: Invigorating Prescribed Fire Science Through Improved Reporting Practices
Source: Frontiers journal article supplement (doi:10.3389/ffgc.2021.750699), 2021-10-27
Supplement: Table_1.docx [file Table_1.docx]

Supplementary Material

# Supplementary Data 1

Abraham, J., Dowling, K., and Florentine, S. (2018). Controlled burn and immediate mobilization of potentially toxic elements in soil, from a legacy mine site in Central Victoria, Australia. *Sci Total Environ* 616–617, 1022–1034. doi:[10.1016/j.scitotenv.2017.10.216](https://doi.org/10.1016/j.scitotenv.2017.10.216).

Alcañiz, M., Outeiro, L., Francos, M., Farguell, J., and Úbeda, X. (2016). Long-term dynamics of soil chemical properties after a prescribed fire in a Mediterranean forest (Montgrí Massif, Catalonia, Spain). *Sci Total Environ* 572, 1329–1335. doi:[10.1016/j.scitotenv.2016.01.115](https://doi.org/10.1016/j.scitotenv.2016.01.115).

Austin, L. V., Silvis, A., Ford, W. M., Muthersbaugh, M., and Powers, K. E. (2018). Bat Activity Following Restoration Prescribed Burning in the Central Appalachian Upland and Riparian Habitats. *Nat. Areas J.* 38, 183–195. doi:[10.3375/043.038.0208](https://doi.org/10.3375/043.038.0208).

Badía-Villas, D., Esteban-Piñeiro, J., Girona-García, A., Ortiz-Perpiñá, O., and Poch, R. M. (2020). Topsoil microstructure changes after a shrubland prescribed burn (Central Pyrenees, NE Spain). *Sci Total Environ* 748, 141253. doi:[10.1016/j.scitotenv.2020.141253](https://doi.org/10.1016/j.scitotenv.2020.141253).

Bain, K., Wayne, A., and Bencini, R. (2016). Prescribed burning as a conservation tool for management of habitat for threatened species: the quokka, Setonix brachyurus, in the southern forests of Western Australia. *Int. J. Wildland Fire* 25, 608–617. doi:[10.1071/WF15138](https://doi.org/10.1071/WF15138).

Barber, N. A., Hosler, S. C., Whiston, P., and Jones, H. P. (2019). Initial Responses of Dung Beetle Communities to Bison Reintroduction in Restored and Remnant Tallgrass Prairie. *Nat. Areas J.* 39, 420–428. doi:[10.3375/043.039.0405](https://doi.org/10.3375/043.039.0405).

Bates, J. D., Boyd, C. S., and Davies, K. W. (2020). Longer-term post-fire succession on Wyoming big sagebrush steppe. *Int. J. Wildland Fire* 29, 229–239. doi:[10.1071/WF19109](https://doi.org/10.1071/WF19109).

Bates, J. D., and Davies, K. W. (2016). Seasonal burning of juniper woodlands and spatial recovery of herbaceous vegetation. *For Ecol Manage* 361, 117–130. doi:[10.1016/j.foreco.2015.10.045](https://doi.org/10.1016/j.foreco.2015.10.045).

Bates, J. D., and Davies, K. W. (2017). Effects of conifer treatments on soil nutrient availability and plant composition in sagebrush steppe. *For Ecol Manage* 400, 631–644. doi:[10.1016/j.foreco.2017.06.033](https://doi.org/10.1016/j.foreco.2017.06.033).

Bates, J. D., and Davies, K. W. (2018). Quaking aspen woodland after conifer control: Tree and shrub dynamics. *For Ecol Manage* 409, 233–240. doi:[10.1016/j.foreco.2017.11.019](https://doi.org/10.1016/j.foreco.2017.11.019).

Bates, J. D., Davies, K. W., Bournoville, J., Boyd, C., O’Connor, R., and Svejcar, T. J. (2019). Herbaceous Biomass Response to Prescribed Fire in Juniper-Encroached Sagebrush Steppe. *Rangel Ecol Manag* 72, 28–35. doi:[10.1016/j.rama.2018.08.003](https://doi.org/10.1016/j.rama.2018.08.003).

Bates, J. D., Davies, K. W., Hulet, A., Miller, R. F., and Roundy, B. (2017). Sage Grouse Groceries: Forb Response to Piñon-Juniper Treatments. *Rangel Ecol Manag* 70, 106–115. doi:[10.1016/j.rama.2016.04.004](https://doi.org/10.1016/j.rama.2016.04.004).

Bellows, R. S., Thomson, A. C., Helmstedt, K. J., York, R. A., and Potts, M. D. (2016). Damage and mortality patterns in young mixed conifer plantations following prescribed fires in the Sierra Nevada, California. *For Ecol Manage* 376, 193–204. doi:[10.1016/j.foreco.2016.05.049](https://doi.org/10.1016/j.foreco.2016.05.049).

Bergstrom, B. J., Sensenig, R. L., Augustine, D. J., and Young, T. P. (2018). Searching for cover: soil enrichment and herbivore exclusion, not fire, enhance African savanna small-mammal abundance. *Ecosphere* 9, e02519. doi:<https://doi.org/10.1002/ecs2.2519>.

Berleman, S. A., Suding, K. N., Fry, D. L., Bartolome, J. W., and Stephens, S. L. (2016). Prescribed Fire Effects on Population Dynamics of an Annual Grassland. *Rangel Ecol Manag* 69, 423–429. doi:[10.1016/j.rama.2016.07.006](https://doi.org/10.1016/j.rama.2016.07.006).

Bernau, C. R., Strand, E. K., and Bunting, S. C. (2018). Fuel bed response to vegetation treatments in juniper-invaded sagebrush steppe. *fire ecol* 14, 1. doi:[10.1186/s42408-018-0002-z](https://doi.org/10.1186/s42408-018-0002-z).

Bigelow, S. W., and Whelan, A. W. (2019). Longleaf pine proximity effects on air temperatures and hardwood top-kill from prescribed fire. *fire ecol* 15, 27. doi:[10.1186/s42408-019-0039-7](https://doi.org/10.1186/s42408-019-0039-7).

Branson, D. H., and Vermeire, L. T. (2016). Grasshopper Responses to Fire and Postfire Grazing in the Northern Great Plains Vary Among Species. *Rangel Ecol Manag* 69, 144–149. doi:[10.1016/j.rama.2015.10.005](https://doi.org/10.1016/j.rama.2015.10.005).

Brewer, M. J., and Clements, C. B. (2020). Meteorological Profiling in the Fire Environment Using UAS. *Fire* 3. doi:[10.3390/fire3030036](https://doi.org/10.3390/fire3030036).

Bridges, J. M., Petropoulos, G. P., and Clerici, N. (2019). Immediate changes in organic matter and plant available nutrients of Haplic Luvisol soils Following different experimental burning intensities in Damak Forest, Hungary. *Forests* 10, 453. doi:[10.3390/f10050453](https://doi.org/10.3390/f10050453).

Brose, P. H. (2017). An evaluation of seven methods for controlling mountain laurel thickets in the mixed-oak forests of the central Appalachian Mountains, USA. *For Ecol Manage* 401, 286–294. doi:[10.1016/j.foreco.2017.06.041](https://doi.org/10.1016/j.foreco.2017.06.041).

Butnor, J. R., Johnsen, K. H., Maier, C. A., and Nelson, C. D. (2020). Intra-Annual Variation in Soil C, N and Nutrients Pools after Prescribed Fire in a Mississippi Longleaf Pine (Pinus palustris Mill.) Plantation. *Forests* 11, 181. doi:[10.3390/f11020181](https://doi.org/10.3390/f11020181).

Cannon, J. B., Henderson, S. K., Bailey, M. H., and Peterson, C. J. (2019). Interactions between wind and fire disturbance in forests: Competing amplifying and buffering effects. *For Ecol Manage* 436, 117–128. doi:[10.1016/j.foreco.2019.01.015](https://doi.org/10.1016/j.foreco.2019.01.015).

Cargill, J., van Etten, E. J. B., and Stock, W. D. (2019). The influence of seed supply and seedbed on seedling recruitment in shelterwood-treated jarrah (Eucalyptus marginata) forest. *For Ecol Manage* 432, 54–63. doi:[10.1016/j.foreco.2018.09.008](https://doi.org/10.1016/j.foreco.2018.09.008).

Casals, P., and Rios, A. I. (2018). Burning intensity and low light availability reduce resprouting ability and vigor of Buxus sempervirens L. after clearing. *Sci Total Environ* 627, 403–416. doi:[10.1016/j.scitotenv.2018.01.227](https://doi.org/10.1016/j.scitotenv.2018.01.227).

Casals, P., Valor, T., Rios, A. I., and Shipley, B. (2018). Leaf and bark functional traits predict resprouting strategies of understory woody species after prescribed fires. *For Ecol Manage* 429, 158–174. doi:[10.1016/j.foreco.2018.07.002](https://doi.org/10.1016/j.foreco.2018.07.002).

Case, E. J., and Harrison, S. (2017). High resistance to managed and natural forest fire in a rare rock-outcrop specialist herb (Boechera constancei, Brassicaceae). *For Ecol Manage* 384, 262–267. doi:[10.1016/j.foreco.2016.10.058](https://doi.org/10.1016/j.foreco.2016.10.058).

Cawson, J. G., and Duff, T. J. (2019). Forest fuel bed ignitability under marginal fire weather conditions in Eucalyptus forests. *Int. J. Wildland Fire* 28, 198. doi:[10.1071/WF18070](https://doi.org/10.1071/WF18070).

Chitwood, M. C., Lashley, M. A., Sherrill, B. L., Sorenson, C., DePerno, C. S., and Moorman, C. E. (2017). Macroarthropod response to time-since-fire in the longleaf pine ecosystem. *For Ecol Manage* 391, 390–395. doi:[10.1016/j.foreco.2017.02.038](https://doi.org/10.1016/j.foreco.2017.02.038).

Christiansen, N. A., Fryirs, K. A., Green, T. J., and Hose, G. C. (2020). Microbial communities of upland peat swamps were no different 1 year after a hazard reduction burn. *Int. J. Wildland Fire* 29, 1021–1028. doi:[10.1071/WF20023](https://doi.org/10.1071/WF20023).

Clapp, J. G., and Beck, J. L. (2016). Short-Term Impacts of Fire-Mediated Habitat Alterations on an Isolated Bighorn Sheep Population. *fire ecol* 12, 80–98. doi:[10.4996/fireecology.1203080](https://doi.org/10.4996/fireecology.1203080).

Clark, K. L., Renninger, H. J., Skowronski, N., Gallagher, M., and Schäfer, K. V. R. (2018a). Decadal-Scale Reduction in Forest Net Ecosystem Production Following Insect Defoliation Contrasts with Short-Term Impacts of Prescribed Fires. *Forests* 9, 145. doi:[10.3390/f9030145](https://doi.org/10.3390/f9030145).

Clark, P. E., Nielson, R. M., Lee, J., Ko, K., Johnson, D. E., Ganskopp, D. C., et al. (2017). Prescribed Fire Effects on Activity and Movement of Cattle in Mesic Sagebrush Steppe. *Rangel Ecol Manag* 70, 437–447. doi:[10.1016/j.rama.2016.11.004](https://doi.org/10.1016/j.rama.2016.11.004).

Clark, P. E., Williams, C. J., and Pierson, F. B. (2018b). Factors affecting efficacy of prescribed fire for western juniper control. *Rangel Ecol Manag* 71, 345–355.

Clyatt, K. A., Keyes, C. R., and Hood, S. M. (2017). Long-term effects of fuel treatments on aboveground biomass accumulation in ponderosa pine forests of the northern Rocky Mountains. *For Ecol Manage* 400, 587–599. doi:[10.1016/j.foreco.2017.06.021](https://doi.org/10.1016/j.foreco.2017.06.021).

Coleborn, K., Baker, A., Treble, P. C., Andersen, M. S., Baker, A., Tadros, C. V., et al. (2018). The impact of fire on the geochemistry of speleothem-forming drip water in a sub-alpine cave. *Sci Total Environ* 642, 408–420. doi:[10.1016/j.scitotenv.2018.05.310](https://doi.org/10.1016/j.scitotenv.2018.05.310).

Cowan, A. D., Smith, J. E., and Fitzgerald, S. A. (2016). Recovering lost ground: Effects of soil burn intensity on nutrients and ectomycorrhiza communities of ponderosa pine seedlings. *For Ecol Manage* 378, 160–172. doi:[10.1016/j.foreco.2016.07.030](https://doi.org/10.1016/j.foreco.2016.07.030).

Cox, M. R., Willcox, E. V., Keyser, P. D., and Vander Yacht, A. L. (2016). Bat response to prescribed fire and overstory thinning in hardwood forest on the Cumberland Plateau, Tennessee. *For Ecol Manage* 359, 221–231. doi:[10.1016/j.foreco.2015.09.048](https://doi.org/10.1016/j.foreco.2015.09.048).

Crotteau, J. S., and Keyes, C. R. (2020). Restoration Treatments Improve Overstory Tree Resistance Attributes and Growth in a Ponderosa Pine/Douglas-Fir Forest. *Forests* 11, 574. doi:[10.3390/f11050574](https://doi.org/10.3390/f11050574).

Crotteau, J. S., Keyes, C. R., Hood, S. M., Larson, A. J., Sutherland, E. K., Wright, D. K., et al. (2018). Stand dynamics 11 years after retention harvest in a lodgepole pine forest. *For Ecol Manage* 427, 169–181. doi:[10.1016/j.foreco.2018.05.013](https://doi.org/10.1016/j.foreco.2018.05.013).

Culpepper, J., Bricken, J. D., Hunt, S. D., Barlow, R. J., Kush, J. S., and Lauer, D. K. (2017). Restoration of Fire-Climax Species within a Rare Longleaf Pine Forest in the Piedmont of North Carolina. *Nat. Areas J.* 37, 564–569. doi:[10.3375/043.037.0413](https://doi.org/10.3375/043.037.0413).

Davies, G. M., Legg, C. J., Smith, A. A., and MacDonald, A. (2019). Development and participatory evaluation of fireline intensity and flame property models for managed burns on Calluna-dominated heathlands. *fire ecol* 15, 30. doi:[10.1186/s42408-019-0046-8](https://doi.org/10.1186/s42408-019-0046-8).

Davies, K. W., and Bates, J. D. (2019). Longer-Term Evaluation of Sagebrush Restoration After Juniper Control and Herbaceous Vegetation Trade-offs. *Rangel Ecol Manag* 72, 260–265. doi:[10.1016/j.rama.2018.10.006](https://doi.org/10.1016/j.rama.2018.10.006).

Davies, K. W., and Bates, J. D. (2020). Re-introducing fire in sagebrush steppe experiencing decreased fire frequency: does burning promote spatial and temporal heterogeneity? *Int. J. Wildland Fire* 29, 686–695. doi:[10.1071/WF20018](https://doi.org/10.1071/WF20018).

Davies, K. W., and Boyd, C. S. (2018). Longer-Term Evaluation of Revegetation of Medusahead-Invaded Sagebrush Steppe. *Rangel Ecol Manag* 71, 292–297. doi:[10.1016/j.rama.2018.02.001](https://doi.org/10.1016/j.rama.2018.02.001).

Davies, K. W., and Dean, A. E. (2019). Prescribed Summer Fire and Seeding Applied to Restore Juniper-Encroached and Exotic Annual Grass-Invaded Sagebrush Steppe. *Rangel Ecol Manag* 72, 635–639. doi:[10.1016/j.rama.2019.03.006](https://doi.org/10.1016/j.rama.2019.03.006).

Davy, J., and Dykier, K. (2017). Longevity of a Controlled Burn’s Impacts on Species Composition and Biomass in Northern California Annual Rangeland During Drought. *Rangel Ecol Manag* 70, 755–758. doi:[10.1016/j.rama.2017.06.009](https://doi.org/10.1016/j.rama.2017.06.009).

Dawe, D. A., Peters, V. S., and Flannigan, M. D. (2020). Post-fire regeneration of endangered limber pine (Pinus flexilis) at the northern extent of its range. *For Ecol Manage* 457, 117725. doi:[10.1016/j.foreco.2019.117725](https://doi.org/10.1016/j.foreco.2019.117725).

Dornbusch, M. J., Limb, R. F., and Sedivec, K. K. (2020). Alternative Grazing Management Strategies Combat Invasive Grass Dominance. *Nat. Areas J.* 40, 86–95. doi:[10.3375/043.040.0110](https://doi.org/10.3375/043.040.0110).

Dumroese, R. K., F. Jurgensen, M., and Page-Dumroese, D. S. (2020). Vegetative and Edaphic Responses in a Northern Mixed Conifer Forest Three Decades after Harvest and Fire: Implications for Managing Regeneration and Carbon and Nitrogen Pools. *Forests* 11, 1040. doi:[10.3390/f11101040](https://doi.org/10.3390/f11101040).

Dziadzio, M. C., Smith, L. L., Chandler, R. B., and Castleberry, S. B. (2016). Effect of nest location on gopher tortoise nest survival. *J Wildl Manage* 80, 1314–1322. doi:<https://doi.org/10.1002/jwmg.21116>.

Elliott, K. J., and Miniat, C. F. (2018). Herbaceous-layer diversity and tree seedling recruitment are enhanced following Rhododendron maximum shrub removal. *For Ecol Manage* 430, 403–412. doi:[10.1016/j.foreco.2018.08.016](https://doi.org/10.1016/j.foreco.2018.08.016).

Ellsworth, L. M., Wrobleski, D. W., Kauffman, J. B., and Reis, S. A. (2016). Ecosystem resilience is evident 17 years after fire in Wyoming big sagebrush ecosystems. *Ecosphere* 7, e01618. doi:<https://doi.org/10.1002/ecs2.1618>.

Emery, R. K., Kleinman, J. S., Goode, J. D., and Hart, J. L. (2020). Effects of catastrophic wind disturbance, salvage logging, and prescribed fire on fuel loading and composition in a Pinus palustris woodland. *For Ecol Manage* 478, 118515. doi:[10.1016/j.foreco.2020.118515](https://doi.org/10.1016/j.foreco.2020.118515).

Espinosa, J., Madrigal, J., De La Cruz, A. C., Guijarro, M., Jimenez, E., and Hernando, C. (2018). Short-term effects of prescribed burning on litterfall biomass in mixed stands of Pinus nigra and Pinus pinaster and pure stands of Pinus nigra in the Cuenca Mountains (Central-Eastern Spain). *Sci Total Environ* 618, 941–951. doi:[10.1016/j.scitotenv.2017.08.291](https://doi.org/10.1016/j.scitotenv.2017.08.291).

Espinosa, J., Madrigal, J., Pando, V., Cruz, A. C. de la, Guijarro, M., and Hernando, C. (2020a). The effect of low-intensity prescribed burns in two seasons on litterfall biomass and nutrient content. *Int. J. Wildland Fire* 29, 1029–1041. doi:[10.1071/WF19132](https://doi.org/10.1071/WF19132).

Espinosa, J., Rodríguez De Rivera, Ó., Madrigal, J., Guijarro, M., and Hernando, C. (2020b). Use of Bayesian Modeling to Determine the Effects of Meteorological Conditions, Prescribed Burn Season, and Tree Characteristics on Litterfall of Pinus nigra and Pinus pinaster Stands. *Forests* 11, 1006. doi:[10.3390/f11091006](https://doi.org/10.3390/f11091006).

Flanagan-Moodie, A. K., Holland, G. J., Clarke, M. F., and Bennett, A. F. (2018). Prescribed burning reduces the abundance of den sites for a hollow-using mammal in a dry forest ecosystem. *For Ecol Manage* 429, 233–243. doi:[10.1016/j.foreco.2018.07.023](https://doi.org/10.1016/j.foreco.2018.07.023).

Foster, D. E., Battles, J. J., Collins, B. M., York, R. A., and Stephens, S. L. (2020). Potential wildfire and carbon stability in frequent-fire forests in the Sierra Nevada: trade-offs from a long-term study. *Ecosphere* 11, e03198. doi:<https://doi.org/10.1002/ecs2.3198>.

Francos, M., Stefanuto, E. B., Úbeda, X., and Pereira, P. (2019). Long-term impact of prescribed fire on soil chemical properties in a wildland-urban interface. Northeastern Iberian Peninsula. *Sci Total Environ* 689, 305–311. doi:[10.1016/j.scitotenv.2019.06.434](https://doi.org/10.1016/j.scitotenv.2019.06.434).

Fuentes, L., Duguy, B., and Nadal-Sala, D. (2018). Short-term effects of spring prescribed burning on the understory vegetation of a Pinus halepensis forest in Northeastern Spain. *Sci Total Environ* 610–611, 720–731. doi:[10.1016/j.scitotenv.2017.08.050](https://doi.org/10.1016/j.scitotenv.2017.08.050).

Ganzlin, P. W., Gundale, M. J., Becknell, R. E., and Cleveland, C. C. (2016). Forest restoration treatments have subtle long-term effects on soil C and N cycling in mixed conifer forests. *Ecol Appl* 26, 1503–1516. doi:<https://doi.org/10.1002/15-1100>.

Gigliotti, L. C., Jones, B. C., Lovallo, M. J., and Diefenbach, D. R. (2018). Snowshoe hare multi-level habitat use in a fire-adapted ecosystem. *J Wildl Manage* 82, 435–444. doi:[10.1002/jwmg.21375](https://doi.org/10.1002/jwmg.21375).

Girona-García, A., Badía-Villas, D., Martí-Dalmau, C., Ortiz-Perpiñá, O., Mora, J. L., and Armas-Herrera, C. M. (2018a). Effects of prescribed fire for pasture management on soil organic matter and biological properties: A 1-year study case in the Central Pyrenees. *Sci Total Environ* 618, 1079–1087. doi:[10.1016/j.scitotenv.2017.09.127](https://doi.org/10.1016/j.scitotenv.2017.09.127).

Girona-García, A., Zufiaurre Galarza, R., Mora, J. L., Armas-Herrera, C. M., Martí, C., Ortiz-Perpiñá, O., et al. (2018b). Effects of prescribed burning for pasture reclamation on soil chemical properties in subalpine shrublands of the Central Pyrenees (NE-Spain). *Sci Total Environ* 644, 583–593. doi:[10.1016/j.scitotenv.2018.06.363](https://doi.org/10.1016/j.scitotenv.2018.06.363).

Giuditta, E., Marzaioli, R., Esposito, A., Ascoli, D., Stinca, A., Mazzoleni, S., et al. (2020). Soil Microbial Diversity, Biomass, and Activity in Two Pine Plantations of Southern Italy Treated with Prescribed Burning. *Forests* 11, 19. doi:[10.3390/f11010019](https://doi.org/10.3390/f11010019).

Goodwin, M. J., North, M. P., Zald, H. S. J., and Hurteau, M. D. (2018). The 15-year post-treatment response of a mixed-conifer understory plant community to thinning and burning treatments. *For Ecol Manage* 429, 617–624. doi:[10.1016/j.foreco.2018.07.058](https://doi.org/10.1016/j.foreco.2018.07.058).

Grau-Andrés, R., Davies, G. M., Gray, A., Scott, E. M., and Waldron, S. (2018). Fire severity is more sensitive to low fuel moisture content on Calluna heathlands than on peat bogs. *Sci Total Environ* 616–617, 1261–1269. doi:[10.1016/j.scitotenv.2017.10.192](https://doi.org/10.1016/j.scitotenv.2017.10.192).

Greenberg, C. H., Keyser, T. L., McNab, W. H., and Scott, P. (2019). Breeding bird response to season of burn in an upland hardwood forest. *For Ecol Manage* 449, 117442. doi:[10.1016/j.foreco.2019.06.039](https://doi.org/10.1016/j.foreco.2019.06.039).

Greenberg, C. H., Seiboldt, T., Keyser, T. L., McNab, W. H., Scott, P., Bush, J., et al. (2018). Reptile and amphibian response to season of burn in an upland hardwood forest. *For Ecol Manage* 409, 808–816. doi:[10.1016/j.foreco.2017.12.016](https://doi.org/10.1016/j.foreco.2017.12.016).

Greenler, S. M., Estrada, L. A., Kellner, K. F., Saunders, M. R., and Swihart, R. K. (2019). Prescribed fire and partial overstory removal alter an acorn–rodent conditional mutualism. *Ecol Appl* 29, e01958. doi:[10.1002/eap.1958](https://doi.org/10.1002/eap.1958).

Greenler, S. M., and Saunders, M. R. (2019). Short-term, spatial regeneration patterns following expanding group shelterwood harvests and prescribed fire in the Central Hardwood Region. *For Ecol Manage* 432, 1053–1063. doi:[10.1016/j.foreco.2018.10.043](https://doi.org/10.1016/j.foreco.2018.10.043).

Greenler, S. M., Swihart, R. K., and Saunders, M. R. (2020). Prescribed fire promotes acorn survival and seedling emergence from simulated caches. *For Ecol Manage* 464, 118063. doi:[10.1016/j.foreco.2020.118063](https://doi.org/10.1016/j.foreco.2020.118063).

Hägglund, R., Dynesius, M., Löfroth, T., Olsson, J., Roberge, J.-M., and Hjältén, J. (2020). Restoration measures emulating natural disturbances alter beetle assemblages in boreal forest. *For Ecol Manage* 462, 117934. doi:[10.1016/j.foreco.2020.117934](https://doi.org/10.1016/j.foreco.2020.117934).

Hall Defrees, D., Averett, J. P., Wisdom, M. J., and Endress, B. A. (2020). Interactive effects of fuels reduction and large herbivores on shrub assemblages in dry conifer forests of the interior west, USA. *For Ecol Manage* 463, 118031. doi:[10.1016/j.foreco.2020.118031](https://doi.org/10.1016/j.foreco.2020.118031).

Halpern, C. B., Antos, J. A., Kothari, S., and Olson, A. M. (2019). Past tree influence and prescribed fire exert strong controls on reassembly of mountain grasslands after tree removal. *Ecol Appl* 29, e01860. doi:<https://doi.org/10.1002/eap.1860>.

Hämäläinen, A., Hujo, M., Heikkala, O., Junninen, K., and Kouki, J. (2016). Retention tree characteristics have major influence on the post-harvest tree mortality and availability of coarse woody debris in clear-cut areas. *For Ecol Manage* 369, 66–73. doi:[10.1016/j.foreco.2016.03.037](https://doi.org/10.1016/j.foreco.2016.03.037).

Harris, K. A., Clark, J. D., Elmore, R. D., and Harper, C. A. (2020). Direct and Indirect Effects of Fire on Eastern Box Turtles. *J Wildl Manage* 84, 1384–1395. doi:<https://doi.org/10.1002/jwmg.21920>.

Harrison, N. M., Stubblefield, A. P., Varner, J. M., and Knapp, E. E. (2016). Finding balance between fire hazard reduction and erosion control in the Lake Tahoe Basin, California–Nevada. *For Ecol Manage* 360, 40–51. doi:[10.1016/j.foreco.2015.10.030](https://doi.org/10.1016/j.foreco.2015.10.030).

Hart, B. T. N., Smith, J. E., Luoma, D. L., and Hatten, J. A. (2018). Recovery of ectomycorrhizal fungus communities fifteen years after fuels reduction treatments in ponderosa pine forests of the Blue Mountains, Oregon. *For Ecol Manage* 422, 11–22. doi:[10.1016/j.foreco.2018.03.050](https://doi.org/10.1016/j.foreco.2018.03.050).

Havrilla, C., Faist, A., and Barger, N. (2017). Understory Plant Community Responses to Fuel-Reduction Treatments and Seeding in an Upland Piñon-Juniper Woodland. *Rangel Ecol Manag* 70. doi:[10.1016/j.rama.2017.04.002](https://doi.org/10.1016/j.rama.2017.04.002).

Heikkala, O., Seibold, S., Koivula, M., Martikainen, P., Müller, J., Thorn, S., et al. (2016). Retention forestry and prescribed burning result in functionally different saproxylic beetle assemblages than clear-cutting. *For Ecol Manage* 359, 51–58. doi:[10.1016/j.foreco.2015.09.043](https://doi.org/10.1016/j.foreco.2015.09.043).

Hill, K. C., Bakker, J. D., and Dunwiddie, P. W. (2017). Prescribed Fire in Grassland Butterfly Habitat: Targeting Weather and Fuel Conditions to Reduce Soil Temperatures and Burn Severity. *fire ecol* 13, 24–41. doi:[10.4996/fireecology.130302441](https://doi.org/10.4996/fireecology.130302441).

Holland, G. J., Clarke, M. F., and Bennett, A. F. (2017). Prescribed burning consumes key forest structural components: implications for landscape heterogeneity. *Ecol Appl* 27, 845–858. doi:[10.1002/eap.1488](https://doi.org/10.1002/eap.1488).

Hood, S. M., Baker, S., and Sala, A. (2016). Fortifying the forest: thinning and burning increase resistance to a bark beetle outbreak and promote forest resilience. *Ecol Appl* 26, 1984–2000. doi:<https://doi.org/10.1002/eap.1363>.

Hovick, T. J., Carroll, J. M., Elmore, R. D., Davis, C. A., and Fuhlendorf, S. D. (2017). Restoring fire to grasslands is critical for migrating shorebird populations. *Ecol Appl* 27, 1805–1814. doi:<https://doi.org/10.1002/eap.1567>.

Hromada, S. J., Howey, C. A. F., Dickinson, M. B., Perry, R. W., Roosenburg, W. M., and Gienger, C. M. (2018). Response of reptile and amphibian communities to the reintroduction of fire in an oak/hickory forest. *For Ecol Manage* 428, 1–13. doi:[10.1016/j.foreco.2018.06.018](https://doi.org/10.1016/j.foreco.2018.06.018).

Hueso-González, P., Martínez-Murillo, J. F., and Ruiz-Sinoga, J. D. (2018). Prescribed fire impacts on soil properties, overland flow and sediment transport in a Mediterranean forest: A 5 year study. *Sci Total Environ* 636, 1480–1489. doi:[10.1016/j.scitotenv.2018.05.004](https://doi.org/10.1016/j.scitotenv.2018.05.004).

Huffman, D. W., Stoddard, M. T., Springer, J. D., Crouse, J. E., Sánchez Meador, A. J., and Nepal, S. (2019). Stand Dynamics of Pinyon-Juniper Woodlands After Hazardous Fuels Reduction Treatments in Arizona. *Rangel Ecol Manag* 72, 757–767. doi:[10.1016/j.rama.2019.05.005](https://doi.org/10.1016/j.rama.2019.05.005).

Jain, T. B., Graham, R. T., Byrne, J. C., and Bright, B. C. (2020). Canopy Opening and Site Preparation Effects on Conifer and Understory Establishment and Growth after an Uneven-Aged Free Selection Regeneration Harvest in the Northern Rocky Mountains, USA. *Forests* 11, 622. doi:[10.3390/f11060622](https://doi.org/10.3390/f11060622).

Jenkins, M. E., Bell, T. L., Poon, L. F., Aponte, C., and Adams, M. A. (2016). Production of pyrogenic carbon during planned fires in forests of East Gippsland, Victoria. *For Ecol Manage* 373, 9–16. doi:[10.1016/j.foreco.2016.04.028](https://doi.org/10.1016/j.foreco.2016.04.028).

Johnson, H. M. A., Limb, R. F., Bauer, M. L., and Sedivec, K. K. (2019). Influence of Land Management Strategies on Browse and Nutritional Quality of Grassland Shrub. *Rangel Ecol Manag* 72, 654–660. doi:[10.1016/j.rama.2019.02.003](https://doi.org/10.1016/j.rama.2019.02.003).

Jordán, A., Zavala, L. M., Granged, A. J. P., Gordillo-Rivero, Á. J., García-Moreno, J., Pereira, P., et al. (2016). Wettability of ash conditions splash erosion and runoff rates in the post-fire. *Sci Total Environ* 572, 1261–1268. doi:[10.1016/j.scitotenv.2015.09.140](https://doi.org/10.1016/j.scitotenv.2015.09.140).

Kennedy, M. C., Johnson, M. C., Fallon, K., and Mayer, D. (2019). How big is enough? Vegetation structure impacts effective fuel treatment width and forest resiliency. *Ecosphere* 10, e02573. doi:<https://doi.org/10.1002/ecs2.2573>.

Keyser, T. L., Greenberg, C. H., and Henry McNab, W. (2019). Season of burn effects on vegetation structure and composition in oak-dominated Appalachian hardwood forests. *For Ecol Manage* 433, 441–452. doi:[10.1016/j.foreco.2018.11.027](https://doi.org/10.1016/j.foreco.2018.11.027).

Keyser, T. L., McDaniel, V. L., Klein, R. N., Drees, D. G., Burton, J. A., and Forder, M. M. (2018). Short-term stem mortality of 10 deciduous broadleaved species following prescribed burning in upland forests of the Southern US. *Int. J. Wildland Fire* 27, 42. doi:[10.1071/WF17058](https://doi.org/10.1071/WF17058).

Kimuyu, D. M., Sensenig, R. L., Chira, R. M., Githaiga, J. M., and Young, T. P. (2017). Spatial scales influence long-term response of herbivores to prescribed burning in a savanna ecosystem. *Int. J. Wildland Fire* 26, 287–295. doi:[10.1071/WF16152](https://doi.org/10.1071/WF16152).

Klaus, J. M., and Noss, R. F. (2016). Specialist and generalist amphibians respond to wetland restoration treatments. *J Wildl Manage* 80, 1106–1119. doi:[10.1002/jwmg.21091](https://doi.org/10.1002/jwmg.21091).

Kleinman, J. S., Goode, J. D., Hart, J. L., and Dey, D. C. (2020). Prescribed fire effects on Pinus palustris woodland development after catastrophic wind disturbance and salvage logging. *For Ecol Manage* 468, 118173. doi:[10.1016/j.foreco.2020.118173](https://doi.org/10.1016/j.foreco.2020.118173).

Klimas, K., Hiesl, P., Hagan, D., and Park, D. (2020). Immediate Effects of Prescribed Fire on Sub-Surface Water Quality in a Managed Yellow Pine Forest. *Fire* 3, 14. doi:[10.3390/fire3020014](https://doi.org/10.3390/fire3020014).

Knapp, E. E., Lydersen, J. M., North, M. P., and Collins, B. M. (2017). Efficacy of variable density thinning and prescribed fire for restoring forest heterogeneity to mixed-conifer forest in the central Sierra Nevada, CA. *For Ecol Manage* 406, 228–241. doi:[10.1016/j.foreco.2017.08.028](https://doi.org/10.1016/j.foreco.2017.08.028).

Kobziar, L. N., Pingree, M. R. A., Larson, H., Dreaden, T. J., Green, S., and Smith, J. A. (2018). Pyroaerobiology: the aerosolization and transport of viable microbial life by wildland fire. *Ecosphere* 9, e02507. doi:<https://doi.org/10.1002/ecs2.2507>.

Kobziar, L. N., Pingree, M. R. A., Watts, A. C., Nelson, K. N., Dreaden, T. J., and Ridout, M. (2019). Accessing the Life in Smoke: A New Application of Unmanned Aircraft Systems (UAS) to Sample Wildland Fire Bioaerosol Emissions and Their Environment. *Fire* 2. doi:[10.3390/fire2040056](https://doi.org/10.3390/fire2040056).

Korb, J. E., Stoddard, M. T., and Huffman, D. W. (2020). Effectiveness of Restoration Treatments for Reducing Fuels and Increasing Understory Diversity in Shrubby Mixed-Conifer Forests of the Southern Rocky Mountains, USA. *Forests* 11, 508. doi:[10.3390/f11050508](https://doi.org/10.3390/f11050508).

Kouki, J., and Salo, K. (2020). Forest disturbances affect functional groups of macrofungi in young successional forests – harvests and fire lead to different fungal assemblages. *For Ecol Manage* 463, 118039. doi:[10.1016/j.foreco.2020.118039](https://doi.org/10.1016/j.foreco.2020.118039).

Krishnaraj, S. J., Baker, T. G., Polglase, P. J., Volkova, L., and Weston, C. J. (2016). Prescribed fire increases pyrogenic carbon in litter and surface soil in lowland Eucalyptus forests of south-eastern Australia. *For Ecol Manage* 366, 98–105. doi:[10.1016/j.foreco.2016.01.038](https://doi.org/10.1016/j.foreco.2016.01.038).

Kriska, D. J., and Krebs, R. A. (2019). Response by Three Plant Indicator Groups of Upland Habitat to Manipulation of a Black Oak (Quercus velutina) Sand Barren. *Nat. Areas J.* 39, 442–451. doi:[10.3375/043.039.0407](https://doi.org/10.3375/043.039.0407).

Kuchinke, D., Di Stefano, J., Sitters, H., Loyn, R., Gell, P., and Palmer, G. (2020). Prescribed burn severity has minimal effect on common bird species in a fire-prone forest ecosystem. *For Ecol Manage* 475, 118437. doi:[10.1016/j.foreco.2020.118437](https://doi.org/10.1016/j.foreco.2020.118437).

Larsen, A. L., Jacquot, J. J., Keenlance, P. W., and Keough, H. L. (2016). Effects of an ongoing oak savanna restoration on small mammals in Lower Michigan. *For Ecol Manage* 367, 120–127. doi:[10.1016/j.foreco.2016.02.016](https://doi.org/10.1016/j.foreco.2016.02.016).

Leuenberger, W., Bearer, S., Duchamp, J., Johnson, S., Leppo, B., McElhenny, P., et al. (2016). A Comparison of Lepidoptera Communities Inhabiting Restored and Late Successional Pitch Pine—Scrub Oak Barrens in Pennsylvania. *Nat. Areas J.* 36, 38–47. doi:[10.3375/043.036.0109](https://doi.org/10.3375/043.036.0109).

Lind, B. M., North, M. P., Maloney, P. E., and Eckert, A. J. (2019). Effect of fire and thinning on fine-scale genetic structure and gene flow in fire-suppressed populations of sugar pine (Pinus lambertiana Dougl.). *For Ecol Manage* 447, 115–129. doi:[10.1016/j.foreco.2019.04.033](https://doi.org/10.1016/j.foreco.2019.04.033).

Lindenmayer, D. B., Wood, J., MacGregor, C., Hobbs, R. J., and Catford, J. A. (2017). Non-target impacts of weed control on birds, mammals, and reptiles. *Ecosphere* 8, e01804. doi:[10.1002/ecs2.1804](https://doi.org/10.1002/ecs2.1804).

Lucas-Borja, M. E., Madrigal, J., Candel-Pérez, D., Jiménez, E., Moya, D., Heras, J. de las, et al. (2016). Effects of prescribed burning, vegetation treatment and seed predation on natural regeneration of Spanish black pine (Pinus nigra Arn. ssp. salzmannii) in pure and mixed forest stands. *For Ecol Manage* 378, 24–30. doi:[10.1016/j.foreco.2016.07.019](https://doi.org/10.1016/j.foreco.2016.07.019).

Lucas-Borja, M. E., Plaza-Álvarez, P. A., Gonzalez-Romero, J., Sagra, J., Alfaro-Sánchez, R., Zema, D. A., et al. (2019). Short-term effects of prescribed burning in Mediterranean pine plantations on surface runoff, soil erosion and water quality of runoff. *Sci Total Environ* 674, 615–622. doi:[10.1016/j.scitotenv.2019.04.114](https://doi.org/10.1016/j.scitotenv.2019.04.114).

Lucas-Borja, M. E., Tiscar, P. A., Plaza-Alvarez, P. A., Sagra Cózar, J., Gonzalez-Romero, J., Moya, D., et al. (2018). Prescribed burning lowers the initial recruitment rates of three pine species that inhabit a mid-altitude Mediterranean mountain. *For Ecol Manage* 427, 325–332. doi:[10.1016/j.foreco.2018.06.015](https://doi.org/10.1016/j.foreco.2018.06.015).

Lydersen, J. M., Collins, B. M., and Hunsaker, C. T. (2019). Implementation constraints limit benefits of restoration treatments in mixed-conifer forests. *Int. J. Wildland Fire* 28, 495. doi:[10.1071/WF18141](https://doi.org/10.1071/WF18141).

Mahoney, K. R., Russell, K. R., Ford, W. M., Rodrigue, J. L., Riddle, J. D., Schuler, T. M., et al. (2016). Woodland salamander responses to a shelterwood harvest-prescribed burn silvicultural treatment within Appalachian mixed-oak forests. *For Ecol Manage* 359, 277–285. doi:[10.1016/j.foreco.2015.09.042](https://doi.org/10.1016/j.foreco.2015.09.042).

Marks-Block, T., Lake, F. K., and Curran, L. M. (2019). Effects of understory fire management treatments on California Hazelnut, an ecocultural resource of the Karuk and Yurok Indians in the Pacific Northwest. *For Ecol Manage* 450, 117517. doi:[10.1016/j.foreco.2019.117517](https://doi.org/10.1016/j.foreco.2019.117517).

Martin, R. A., and Hamman, S. T. (2016). Ignition Patterns Influence Fire Severity and Plant Communities in Pacific Northwest, USA, Prairies. *fire ecol* 12, 88–102. doi:[10.4996/fireecology.1201088](https://doi.org/10.4996/fireecology.1201088).

Mata-González, R., Reed-Dustin, C. M., and Rodhouse, T. J. (2018). Contrasting Effects of Long-Term Fire on Sagebrush Steppe Shrubs Mediated by Topography and Plant Community. *Rangel Ecol Manag* 71, 336–344. doi:[10.1016/j.rama.2017.12.007](https://doi.org/10.1016/j.rama.2017.12.007).

McCaskill, G. L. (2019). The Hungry Bob Fire &amp; Fire Surrogate Study: A 20-Year Evaluation of the Treatment Effects. *Forests* 10, 15. doi:[10.3390/f10010015](https://doi.org/10.3390/f10010015).

McCloughan, A. C., Rideout-Hanzak, S., Wester, D. B., and Xi, W. (2017). Evaluating Removal of Competition on Morphology of Endangered Slender Rush-Pea (Hoffmannseggia tenella) Endemic to Southern Texas, USA. *Nat. Areas J.* 37, 382–393. doi:[10.3375/043.037.0311](https://doi.org/10.3375/043.037.0311).

McDonald, L. A., Grayson, K. L., Lin, H. A., and Vonesh, J. R. (2018). Stage-specific effects of fire: Effects of prescribed burning on adult abundance, oviposition habitat selection, and larval performance of Cope’s Gray Treefrog (Hyla chrysoscelis). *For Ecol Manage* 430, 394–402. doi:[10.1016/j.foreco.2018.08.008](https://doi.org/10.1016/j.foreco.2018.08.008).

McKenna, P., Phinn, S., and Erskine, P. D. (2018). Fire Severity and Vegetation Recovery on Mine Site Rehabilitation Using WorldView-3 Imagery. *Fire* 1, 22. doi:[10.3390/fire1020022](https://doi.org/10.3390/fire1020022).

McNichol, B. H., Montes, C. R., Barnes, B. F., Nowak, J. T., Villari, C., and Gandhi, K. J. K. (2019). Interactions between southern Ips bark beetle outbreaks, prescribed fire, and loblolly pine (Pinus taeda L.) mortality. *For Ecol Manage* 446, 164–174. doi:[10.1016/j.foreco.2019.05.036](https://doi.org/10.1016/j.foreco.2019.05.036).

McNitt, D. C., Alonso, R. S., Cherry, M. J., Fies, M. L., and Kelly, M. J. (2020). Influence of forest disturbance on bobcat resource selection in the central Appalachians. *For Ecol Manage* 465, 118066. doi:[10.1016/j.foreco.2020.118066](https://doi.org/10.1016/j.foreco.2020.118066).

Molina, J. R., García, J. P., Fernández, J. J., and Rodríguez y Silva, F. (2018). Prescribed fire experiences on crop residue removal for biomass exploitations. Application to the maritime pine forests in the Mediterranean Basin. *Sci Total Environ* 612, 63–70. doi:[10.1016/j.scitotenv.2017.08.182](https://doi.org/10.1016/j.scitotenv.2017.08.182).

Moran, E. V., Das, A. J., Keeley, J. E., and Stephenson, N. L. (2019). Negative impacts of summer heat on Sierra Nevada tree seedlings. *Ecosphere* 10, e02776. doi:<https://doi.org/10.1002/ecs2.2776>.

Múgica, L., Canals, R. M., and San Emeterio, L. (2018). Changes in soil nitrogen dynamics caused by prescribed fires in dense gorse lands in SW Pyrenees. *Sci Total Environ* 639, 175–185. doi:[10.1016/j.scitotenv.2018.05.139](https://doi.org/10.1016/j.scitotenv.2018.05.139).

Muñoz Delgado, B. L., Kenefic, L. S., Weiskittel, A. R., Fernandez, I. J., Benjamin, J. G., and Dibble, A. C. (2019). Northern mixedwood composition and productivity 50 years after whole-tree and stem-only harvesting with and without post-harvest prescribed burning. *For Ecol Manage* 441, 155–166. doi:[10.1016/j.foreco.2019.03.032](https://doi.org/10.1016/j.foreco.2019.03.032).

Nakhoul, J., Santonja, M., Fernandez, C., Greff, S., Bousquet-Mélou, A., Dupouyet, S., et al. (2020). Soil scarification favors natural regeneration of Pinus pinea in Lebanon forests: Evidences from field and laboratory experiments. *For Ecol Manage* 459, 117840. doi:[10.1016/j.foreco.2019.117840](https://doi.org/10.1016/j.foreco.2019.117840).

Nanney, J. S., Harper, C. A., Buehler, D. A., and Bates, G. E. (2018). Nutritional carrying capacity for cervids following disturbance in hardwood forests. *J Wildl Manage* 82, 1219–1228. doi:[10.1002/jwmg.21473](https://doi.org/10.1002/jwmg.21473).

Nelson, M., Hosler, S. C., Boetzl, F. A., Jones, H. P., and Barber, N. A. (2021). Reintroduced grazers and prescribed fire effects on beetle assemblage structure and function in restored grasslands. *Ecol Appl* 31, e02217. doi:<https://doi.org/10.1002/eap.2217>.

Nemens, D. G., Varner, J. M., and Dunwiddie, P. W. (2019). Resilience of Oregon white oak to reintroduction of fire. *fire ecol* 15, 29. doi:[10.1186/s42408-019-0045-9](https://doi.org/10.1186/s42408-019-0045-9).

Olivares, C. I., Zhang, W., Uzun, H., Erdem, C. U., Majidzadeh, H., Trettin, C., et al. (2019). Optical in-situ sensors capture dissolved organic carbon (DOC) dynamics after prescribed fire in high-DOC forest watersheds. *Int. J. Wildland Fire* 28, 761–768. doi:[10.1071/WF18175](https://doi.org/10.1071/WF18175).

Orlova, J., Olefeldt, D., Yasinski, J. H., and Anderson, A. E. (2020). Effects of Prescribed Burn on Nutrient and Dissolved Organic Matter Characteristics in Peatland Shallow Groundwater. *Fire* 3, 53. doi:[10.3390/fire3030053](https://doi.org/10.3390/fire3030053).

Ottmar, R. D., Hiers, J. K., Butler, B. W., Clements, C. B., Dickinson, M. B., Hudak, A. T., et al. (2016). Measurements, datasets and preliminary results from the RxCADRE project – 2008, 2011 and 2012. *Int. J. Wildland Fire* 25, 1–9. doi:[10.1071/WF14161](https://doi.org/10.1071/WF14161).

Overby, S. T., and Hart, S. C. (2016). Short-Term Belowground Responses to Thinning and Burning Treatments in Southwestern Ponderosa Pine Forests of the USA. *Forests* 7, 45. doi:[10.3390/f7020045](https://doi.org/10.3390/f7020045).

Parkins, K., Scott, A., Di Stefano, J., Swan, M., Sitters, H., and York, A. (2019). Habitat use at fire edges: Does animal activity follow temporal patterns of habitat change? *For Ecol Manage* 451, 117343. doi:[10.1016/j.foreco.2019.05.013](https://doi.org/10.1016/j.foreco.2019.05.013).

Parra, A., and Moreno, J. M. (2018). Drought differentially affects the post-fire dynamics of seeders and resprouters in a Mediterranean shrubland. *Sci Total Environ* 626, 1219–1229. doi:[10.1016/j.scitotenv.2018.01.174](https://doi.org/10.1016/j.scitotenv.2018.01.174).

Paudel, A., Markwith, S. H., Konchar, K., Shrestha, M., and Ghimire, S. K. (2020). Anthropogenic fire, vegetation structure and ethnobotanical uses in an alpine shrubland of Nepal’s Himalaya. *Int. J. Wildland Fire* 29, 201–214. doi:[10.1071/WF19098](https://doi.org/10.1071/WF19098).

Pereira, P., Cerda, A., Martin, D., Úbeda, X., Depellegrin, D., Novara, A., et al. (2017). Short-term low-severity spring grassland fire impacts on soil extractable elements and soil ratios in Lithuania. *Sci Total Environ* 578, 469–475. doi:[10.1016/j.scitotenv.2016.10.210](https://doi.org/10.1016/j.scitotenv.2016.10.210).

Piqué, M., and Domènech, R. (2018). Effectiveness of mechanical thinning and prescribed burning on fire behavior in Pinus nigra forests in NE Spain. *Sci Total Environ* 618, 1539–1546. doi:[10.1016/j.scitotenv.2017.09.316](https://doi.org/10.1016/j.scitotenv.2017.09.316).

Plaza-Álvarez, P. A., Lucas-Borja, M. E., Sagra, J., Moya, D., Alfaro-Sánchez, R., González-Romero, J., et al. (2018). Changes in soil water repellency after prescribed burnings in three different Mediterranean forest ecosystems. *Sci Total Environ* 644, 247–255. doi:[10.1016/j.scitotenv.2018.06.364](https://doi.org/10.1016/j.scitotenv.2018.06.364).

Plaza-Álvarez, P. A., Lucas-Borja, M. E., Sagra, J., Moya, D., Fontúrbel, T., and De las Heras, J. (2017). Soil Respiration Changes after Prescribed Fires in Spanish Black Pine (Pinus nigra Arn. ssp. salzmannii) Monospecific and Mixed Forest Stands. *Forests* 8, 248. doi:[10.3390/f8070248](https://doi.org/10.3390/f8070248).

Potthast, K., Meyer, S., Crecelius, A. C., Schubert, U. S., Tischer, A., and Michalzik, B. (2017). Land-use and fire drive temporal patterns of soil solution chemistry and nutrient fluxes. *Sci Total Environ* 605–606, 514–526. doi:[10.1016/j.scitotenv.2017.06.182](https://doi.org/10.1016/j.scitotenv.2017.06.182).

Poulos, H. M., Reemts, C. M., Wogan, K. A., Karges, J. P., and Gatewood, R. G. (2020). Multiple wildfires with minimal consequences: Low-severity wildfire effects on West Texas piñon-juniper woodlands. *For Ecol Manage* 473, 118293. doi:[10.1016/j.foreco.2020.118293](https://doi.org/10.1016/j.foreco.2020.118293).

Progar, R. A., Hrinkevich, K. H., Clark, E. S., and Rinella, M. J. (2017). Prescribed Burning in Ponderosa Pine: Fuel Reductions and Redistributing Fuels near Boles to Prevent Injury. *fire ecol* 13, 149–161. doi:[10.4996/fireecology.1301149](https://doi.org/10.4996/fireecology.1301149).

Quigley, K. M., Wildt, R. E., Sturtevant, B. R., Kolka, R. K., Dickinson, M. B., Kern, C. C., et al. (2019). Fuels, vegetation, and prescribed fire dynamics influence ash production and characteristics in a diverse landscape under active pine barrens restoration. *fire ecol* 15, 5. doi:[10.1186/s42408-018-0015-7](https://doi.org/10.1186/s42408-018-0015-7).

Ray, D. G., Cahalan, G. D., and Lendemer, J. C. (2020). Factors influencing the persistence of reindeer lichens (Cladonia subgenus Cladina) within frequent-fire environments of the Mid-Atlantic Coastal Plain, USA. *fire ecol* 16, 1. doi:[10.1186/s42408-019-0063-7](https://doi.org/10.1186/s42408-019-0063-7).

Ray, D. G., and Landau, D. (2019). Tree Mortality Following Mixed-Severity Prescribed Fire Dramatically Alters the Structure of a Developing Pinus taeda Forest on the Mid-Atlantic Coastal Plain. *Fire* 2, 25. doi:[10.3390/fire2020025](https://doi.org/10.3390/fire2020025).

Reazin, C., Morris, S., Smith, J. E., Cowan, A. D., and Jumpponen, A. (2016). Fires of differing intensities rapidly select distinct soil fungal communities in a Northwest US ponderosa pine forest ecosystem. *For Ecol Manage* 377, 118–127. doi:[10.1016/j.foreco.2016.07.002](https://doi.org/10.1016/j.foreco.2016.07.002).

Rebbeck, J., Hutchinson, T. F., and Iverson, L. R. (2019). Effects of prescribed fire and stem-injection herbicide on Ailanthus altissima demographics and survival. *For Ecol Manage* 439, 122–131. doi:[10.1016/j.foreco.2019.02.044](https://doi.org/10.1016/j.foreco.2019.02.044).

Rebbeck, J., Hutchinson, T., Iverson, L., Yaussy, D., and Fox, T. (2017). Distribution and demographics of Ailanthus altissima in an oak forest landscape managed with timber harvesting and prescribed fire. *For Ecol Manage* 401, 233–241. doi:[10.1016/j.foreco.2017.06.050](https://doi.org/10.1016/j.foreco.2017.06.050).

Reidy, J. L., Thompson, F. R., Schwope, C., Rowin, S., and Mueller, J. M. (2016). Effects of prescribed fire on fuels, vegetation, and Golden-cheeked Warbler (Setophaga chrysoparia) demographics in Texas juniper-oak woodlands. *For Ecol Manage* 376, 96–106. doi:[10.1016/j.foreco.2016.06.005](https://doi.org/10.1016/j.foreco.2016.06.005).

Restaino, C., Young, D. J. N., Estes, B., Gross, S., Wuenschel, A., Meyer, M., et al. (2019). Forest structure and climate mediate drought-induced tree mortality in forests of the Sierra Nevada, USA. *Ecol Appl* 29, e01902. doi:<https://doi.org/10.1002/eap.1902>.

Retzlaff, M. L., Keane, R. E., Affleck, D. L., and Hood, S. M. (2018). Growth Response of Whitebark Pine (Pinus albicaulis Engelm) Regeneration to Thinning and Prescribed Burn Treatments. *Forests* 9, 311. doi:[10.3390/f9060311](https://doi.org/10.3390/f9060311).

Rodríguez, A., and Kouki, J. (2017). Disturbance-mediated heterogeneity drives pollinator diversity in boreal managed forest ecosystems. *Ecol Appl* 27, 589–602. doi:<https://doi.org/10.1002/eap.1468>.

Rosche, S. B., Moorman, C. E., Pacifici, K., Jones, J. G., and DePerno, C. S. (2019). Northern bobwhite breeding season habitat selection in fire-maintained pine woodland. *J Wildl Manage* 83, 1226–1236. doi:[10.1002/jwmg.21683](https://doi.org/10.1002/jwmg.21683).

Rossman, A. K., Halpern, C. B., Harrod, R. J., Urgenson, L. S., Peterson, D. W., and Bakker, J. D. (2018). Benefits of thinning and burning for understory diversity vary with spatial scale and time since treatment. *For Ecol Manage* 419–420, 58–78. doi:[10.1016/j.foreco.2018.03.006](https://doi.org/10.1016/j.foreco.2018.03.006).

Roundy, B. A., Chambers, J. C., Pyke, D. A., Miller, R. F., Tausch, R. J., Schupp, E. W., et al. (2018). Resilience and resistance in sagebrush ecosystems are associated with seasonal soil temperature and water availability. *Ecosphere* 9, e02417. doi:[10.1002/ecs2.2417](https://doi.org/10.1002/ecs2.2417).

Rubene, D., Schroeder, M., and Ranius, T. (2017). Effectiveness of local conservation management is affected by landscape properties: Species richness and composition of saproxylic beetles in boreal forest clearcuts. *For Ecol Manage* 399, 54–63. doi:[10.1016/j.foreco.2017.05.025](https://doi.org/10.1016/j.foreco.2017.05.025).

Sagra, J., Ferrandis, P., Plaza-Álvarez, P. A., Lucas-Borja, M. E., González-Romero, J., Alfaro-Sánchez, R., et al. (2018). Regeneration of Pinus pinaster Aiton after prescribed fires: Response to burn timing and biogeographical seed provenance across a climatic gradient. *Sci Total Environ* 637–638, 1550–1558. doi:[10.1016/j.scitotenv.2018.05.138](https://doi.org/10.1016/j.scitotenv.2018.05.138).

Sagra, J., Moya, D., Plaza-Álvarez, P. A., Lucas-Borja, M. E., Alfaro-Sánchez, R., De Las Heras, J., et al. (2017). Predation on Early Recruitment in Mediterranean Forests after Prescribed Fires. *Forests* 8, 243. doi:[10.3390/f8070243](https://doi.org/10.3390/f8070243).

Sagra, J., Moya, D., Plaza-Álvarez, P. A., Lucas-Borja, M. E., González-Romero, J., De las Heras, J., et al. (2019). Prescribed fire effects on early recruitment of Mediterranean pine species depend on fire exposure and seed provenance. *For Ecol Manage* 441, 253–261. doi:[10.1016/j.foreco.2019.03.057](https://doi.org/10.1016/j.foreco.2019.03.057).

Santín, C., Otero, X. L., Doerr, S. H., and Chafer, C. J. (2018). Impact of a moderate/high-severity prescribed eucalypt forest fire on soil phosphorous stocks and partitioning. *Sci Total Environ* 621, 1103–1114. doi:[10.1016/j.scitotenv.2017.10.116](https://doi.org/10.1016/j.scitotenv.2017.10.116).

Saud, P., Cram, D., Smallidge, S., and Baker, T. (2018). Coarse Woody Debris Following Silviculture Treatments in Southwest Mixed-Conifer Forest. *Forests* 9, 347. doi:[10.3390/f9060347](https://doi.org/10.3390/f9060347).

Sharma, A., Brethauer, D. K., McKeithen, J., Bohn, K. K., and Vogel, J. G. (2020). Prescribed Burn Effects on Natural Regeneration in Pine Flatwoods: Implications for Uneven-Aged Stand Conversion from a Florida Study. *Forests* 11, 328. doi:[10.3390/f11030328](https://doi.org/10.3390/f11030328).

Sharpe, M., Hwang, H., Schroeder, D., Ryu, S. R., and Lieffers, V. J. (2017). Prescribed fire as a tool to regenerate live and dead serotinous jack pine (Pinus banksiana) stands. *Int. J. Wildland Fire* 26, 478. doi:[10.1071/WF17046](https://doi.org/10.1071/WF17046).

Shearman, T. M., Varner, J. M., and Kreye, J. K. (2019). Pyrogenic flowering of Aristida beyrichiana following 50 years of fire exclusion. *Ecosphere* 10, e02541. doi:<https://doi.org/10.1002/ecs2.2541>.

Silvis, A., Gehrt, S. D., and Williams, R. A. (2016). Effects of shelterwood harvest and prescribed fire in upland Appalachian hardwood forests on bat activity. *For Ecol Manage* 360, 205–212. doi:[10.1016/j.foreco.2015.10.010](https://doi.org/10.1016/j.foreco.2015.10.010).

Singh, G., Schoonover, J. E., Monroe, K. S., Williard, K. W. J., and Ruffner, C. M. (2017). Prescribed Burning and Erosion Potential in Mixed Hardwood Forests of Southern Illinois. *Forests* 8, 112. doi:[10.3390/f8040112](https://doi.org/10.3390/f8040112).

Sittler, K. L., Parker, K. L., and Gillingham, M. P. (2019). Vegetation and prescribed fire: Implications for Stone’s sheep and elk. *J Wildl Manage* 83, 393–409. doi:[10.1002/jwmg.21591](https://doi.org/10.1002/jwmg.21591).

Slack, A. W., Zeibig-Kichas, N. E., Kane, J. M., and Varner, J. M. (2016). Contingent resistance in longleaf pine (Pinus palustris) growth and defense 10years following smoldering fires. *For Ecol Manage* 364, 130–138. doi:[10.1016/j.foreco.2016.01.014](https://doi.org/10.1016/j.foreco.2016.01.014).

Smith, B. W., Dabbert, B. C., and Verble, R. M. (2019). Prescribed Fire Effects on Rangeland Dung Beetles (Coleoptera: Scarabaeinae, Aphodiinae) in the Southern Great Plains. *Rangel Ecol Manag* 72, 120–125. doi:[10.1016/j.rama.2018.07.003](https://doi.org/10.1016/j.rama.2018.07.003).

Sollmann, R., White, A. M., Tarbill, G. L., Manley, P. N., and Knapp, E. E. (2016). Landscape heterogeneity compensates for fuel reduction treatment effects on Northern flying squirrel populations. *For Ecol Manage* 373, 100–107. doi:[10.1016/j.foreco.2016.04.041](https://doi.org/10.1016/j.foreco.2016.04.041).

Sparks, A. M., Smith, A. M. S., Talhelm, A. F., Kolden, C. A., Yedinak, K. M., and Johnson, D. M. (2017). Impacts of fire radiative flux on mature Pinus ponderosa growth and vulnerability to secondary mortality agents. *Int. J. Wildland Fire* 26, 95. doi:[10.1071/WF16139](https://doi.org/10.1071/WF16139).

Spiess, J. W., McGranahan, D. A., Geaumont, B., Sedivec, K., Lakey, M., Berti, M., et al. (2020). Patch-Burning Buffers Forage Resources and Livestock Performance to Mitigate Drought in the Northern Great Plains. *Rangel Ecol Manag* 73, 473–481. doi:[10.1016/j.rama.2020.03.003](https://doi.org/10.1016/j.rama.2020.03.003).

Spitz, D. B., Clark, D. A., Wisdom, M. J., Rowland, M. M., Johnson, B. K., Long, R. A., et al. (2018). Fire history influences large-herbivore behavior at circadian, seasonal, and successional scales. *Ecol Appl* 28, 2082–2091. doi:<https://doi.org/10.1002/eap.1797>.

Starns, H. D., Fuhlendorf, S. D., Elmore, R. D., Twidwell, D., Thacker, E. T., Hovick, T. J., et al. (2019). Recoupling fire and grazing reduces wildland fuel loads on rangelands. *Ecosphere* 10, e02578. doi:<https://doi.org/10.1002/ecs2.2578>.

Stuart, K. D., Haegen, W. M. V., Jenkins, K. J., Keren, I. N., and West, S. D. (2018). Western gray squirrel resource selection related to fire fuel management. *J Wildl Manage* 82, 1478–1490. doi:[10.1002/jwmg.21499](https://doi.org/10.1002/jwmg.21499).

Suominen, M., Junninen, K., Heikkala, O., and Kouki, J. (2018). Burning harvested sites enhances polypore diversity on stumps and slash. *For Ecol Manage* 414, 47–53. doi:[10.1016/j.foreco.2018.02.007](https://doi.org/10.1016/j.foreco.2018.02.007).

Suominen, M., Junninen, K., and Kouki, J. (2019). Diversity of fungi in harvested forests 10 years after logging and burning: Polypore assemblages on different woody substrates. *For Ecol Manage* 446, 63–70. doi:[10.1016/j.foreco.2019.05.030](https://doi.org/10.1016/j.foreco.2019.05.030).

Tangney, R., Issa, N. A., Merritt, D. J., Callow, J. N., and Miller, B. P. (2018). A method for extensive spatiotemporal assessment of soil temperatures during an experimental fire using distributed temperature sensing in optical fibre. *Int. J. Wildland Fire* 27, 135. doi:[10.1071/WF17107](https://doi.org/10.1071/WF17107).

Tardós, P., Lucas-Borja, M. E., Beltrán, M., Onkelinx, T., and Piqué, M. (2019). Composite low thinning and slash burning treatment enhances initial Spanish black pine seedling recruitment. *For Ecol Manage* 433, 1–12. doi:[10.1016/j.foreco.2018.10.042](https://doi.org/10.1016/j.foreco.2018.10.042).

Tepley, A. J., Hood, S. M., Keyes, C. R., and Sala, A. (2020). Forest restoration treatments in a ponderosa pine forest enhance physiological activity and growth under climatic stress. *Ecol Appl*, eap.2188. doi:[10.1002/eap.2188](https://doi.org/10.1002/eap.2188).

Thompson, C. M., and Purcell, K. L. (2016). Conditions inside fisher dens during prescribed fires; what is the risk posed by spring underburns? *For Ecol Manage* 359, 156–161. doi:[10.1016/j.foreco.2015.10.003](https://doi.org/10.1016/j.foreco.2015.10.003).

Thompson, D. K., Schroeder, D., Wilkinson, S. L., Barber, Q., Baxter, G., Cameron, H., et al. (2020). Recent Crown Thinning in a Boreal Black Spruce Forest Does Not Reduce Spread Rate nor Total Fuel Consumption: Results from an Experimental Crown Fire in Alberta, Canada. *Fire* 3, 28. doi:[10.3390/fire3030028](https://doi.org/10.3390/fire3030028).

Thompson, E. G., Coates, T. A., Aust, W. M., and Thomas-Van Gundy, M. A. (2019). Wildfire and Prescribed Fire Effects on Forest Floor Properties and Erosion Potential in the Central Appalachian Region, USA. *Forests* 10, 493. doi:[10.3390/f10060493](https://doi.org/10.3390/f10060493).

Torres, F. T. P., Romeiro, J. M. N., Santos, A. C. de A., de Oliveira Neto, R. R., Lima, G. S., and Zanuncio, J. C. (2018). Fire danger index efficiency as a function of fuel moisture and fire behavior. *Sci Total Environ* 631–632, 1304–1310. doi:[10.1016/j.scitotenv.2018.03.121](https://doi.org/10.1016/j.scitotenv.2018.03.121).

Torrez, E. C. B. de, Ober, H. K., and McCleery, R. A. (2018). Activity of an endangered bat increases immediately following prescribed fire. *J Wildl Manage* 82, 1115–1123. doi:[10.1002/jwmg.21481](https://doi.org/10.1002/jwmg.21481).

Urza, A. K., Weisberg, P. J., Chambers, J. C., Dhaemers, J. M., and Board, D. (2017). Post-fire vegetation response at the woodland–shrubland interface is mediated by the pre-fire community. *Ecosphere* 8, e01851. doi:[10.1002/ecs2.1851](https://doi.org/10.1002/ecs2.1851).

Valkó, O., Deák, B., Magura, T., Török, P., Kelemen, A., Tóth, K., et al. (2016). Supporting biodiversity by prescribed burning in grasslands — A multi-taxa approach. *Sci Total Environ* 572, 1377–1384. doi:[10.1016/j.scitotenv.2016.01.184](https://doi.org/10.1016/j.scitotenv.2016.01.184).

Valor, T., Casals, P., Altieri, S., González-Olabarria, J. R., Piqué, M., and Battipaglia, G. (2018). Disentangling the effects of crown scorch and competition release on the physiological and growth response of Pinus halepensis Mill. using δ13C and δ18O isotopes. *For Ecol Manage* 424, 276–287. doi:[10.1016/j.foreco.2018.04.056](https://doi.org/10.1016/j.foreco.2018.04.056).

Valor, T., González-Olabarria, J. R., Piqué, M., and Casals, P. (2017). The effects of burning season and severity on the mortality over time of Pinus nigra spp. salzmannii (Dunal) Franco and P. sylvestris L. *For Ecol Manage* 406, 172–183. doi:[10.1016/j.foreco.2017.08.027](https://doi.org/10.1016/j.foreco.2017.08.027).

van Mantgem, P. J., Caprio, A. C., Stephenson, N. L., and Das, A. J. (2016). Does Prescribed Fire Promote Resistance to Drought in Low Elevation Forests of the Sierra Nevada, California, USA? *fire ecol* 12, 13–25. doi:[10.4996/fireecology.1201013](https://doi.org/10.4996/fireecology.1201013).

Vander Yacht, A. L. V., Keyser, P. D., Buehler, D. A., Harper, C. A., Buckley, D. S., and Applegate, R. D. (2016). Avian occupancy response to oak woodland and savanna restoration. J Wildl Manage 80, 1091–1105. doi:10.1002/jwmg.21097.

Vander Yacht, A. L., Barrioz, S. A., Keyser, P. D., Harper, C. A., Buckley, D. S., Buehler, D. A., et al. (2017a). Vegetation response to canopy disturbance and season of burn during oak woodland and savanna restoration in Tennessee. *For Ecol Manage* 390, 187–202. doi:[10.1016/j.foreco.2017.01.029](https://doi.org/10.1016/j.foreco.2017.01.029).

Vander Yacht, A. L., Keyser, P. D., Harper, C. A., Buckley, D. S., and Saxton, A. M. (2017b). Restoration of oak woodlands and savannas in Tennessee using canopy-disturbance, fire-season, and herbicides. *For Ecol Manage* 406, 351–360. doi:[10.1016/j.foreco.2017.07.031](https://doi.org/10.1016/j.foreco.2017.07.031).

Vander Yacht, A. L., Keyser, P. D., Kwit, C., Stambaugh, M. C., Clatterbuck, W. K., and Simon, D. M. (2019). Fuel dynamics during oak woodland and savanna restoration in the Mid-South USA. *Int. J. Wildland Fire* 28, 70. doi:[10.1071/WF18048](https://doi.org/10.1071/WF18048).

Vermeire, L. T., and Russell, M. L. (2018). Seasonal Timing of Fire Alters Biomass and Species Composition of Northern Mixed Prairie. *Rangel Ecol Manag* 71, 714–720. doi:[10.1016/j.rama.2018.06.005](https://doi.org/10.1016/j.rama.2018.06.005).

Versluijs, M., Eggers, S., Hjältén, J., Löfroth, T., and Roberge, J.-M. (2017). Ecological restoration in boreal forest modifies the structure of bird assemblages. *For Ecol Manage* 401, 75–88. doi:[10.1016/j.foreco.2017.06.055](https://doi.org/10.1016/j.foreco.2017.06.055).

Volkova, L., and Weston, C. J. (2019). Effect of thinning and burning fuel reduction treatments on forest carbon and bushfire fuel hazard in Eucalyptus sieberi forests of South-Eastern Australia. *Sci Total Environ* 694, 133708. doi:[10.1016/j.scitotenv.2019.133708](https://doi.org/10.1016/j.scitotenv.2019.133708).

Waring, K. M., Hansen, K. J., and Flatley, W. T. (2016). Evaluating Prescribed Fire Effectiveness Using Permanent Monitoring Plot Data: A Case Study. *fire ecol* 12, 2–25. doi:[10.4996/fireecology.1203002](https://doi.org/10.4996/fireecology.1203002).

Watson, P. A., Alexander, H. D., and Moczygemba, J. D. (2019). Coastal Prairie Recovery in Response to Shrub Removal Method and Degree of Shrub Encroachment. *Rangel Ecol Manag* 72, 275–282. doi:[10.1016/j.rama.2018.11.005](https://doi.org/10.1016/j.rama.2018.11.005).

Wester, D. B., Rideout-Hanzak, S., Britton, C. M., and May, B. C. (2019). Effects of Prescribed Fire on Kuenzler’s Hedgehog Cactus (Echinocereus fendleri var. kuenzleri). *Nat. Areas J.* 39, 339–350. doi:[10.3375/043.039.0306](https://doi.org/10.3375/043.039.0306).

Westlake, S. M., Mason, D., Lázaro-Lobo, A., Burr, P., McCollum, J. R., Chance, D., et al. (2020). The magnet effect of fire on herbivores affects plant community structure in a forested system. *For Ecol Manage* 458, 117794. doi:[10.1016/j.foreco.2019.117794](https://doi.org/10.1016/j.foreco.2019.117794).

Wieren, J. F. V., and Simons, A. M. (2019). Prescribed Fire Increases Seedling Recruitment in a Natural Pitch Pine (Pinus rigida) Population at its Northern Range Limit. *Nat. Areas J.* 39, 308–318. doi:[10.3375/043.039.0303](https://doi.org/10.3375/043.039.0303).

Wilkin, K. M., Ponisio, L. C., Fry, D. L., Tubbesing, C. L., Potts, J. B., and Stephens, S. L. (2017). Decade-Long Plant Community Responses to Shrubland Fuel Hazard Reduction. *fire ecol* 13, 105–136. doi:[10.4996/fireecology.130210513](https://doi.org/10.4996/fireecology.130210513).

Williams, R. E., Roundy, B. A., Hulet, A., Miller, R. F., Tausch, R. J., Chambers, J. C., et al. (2017). Pretreatment Tree Dominance and Conifer Removal Treatments Affect Plant Succession in Sagebrush Communities. *Rangel Ecol Manag* 70, 759–773. doi:[10.1016/j.rama.2017.05.007](https://doi.org/10.1016/j.rama.2017.05.007).

Winder, V. L., McNew, L. B., Pitman, J. C., and Sandercock, B. K. (2018). Effects of rangeland management on survival of female greater prairie-chickens. *J Wildl Manage* 82, 113–122. doi:<https://doi.org/10.1002/jwmg.21331>.

Wonkka, C. L., West, J. B., Twidwell, D., and Rogers, W. E. (2017). Grass Mortality and Turnover Following Core Rangeland Restoration Practices. *Rangel Ecol Manag* 70, 290–300. doi:[10.1016/j.rama.2016.10.011](https://doi.org/10.1016/j.rama.2016.10.011).

Wood, J. D., Cohen, B. S., Conner, L. M., Collier, B. A., and Chamberlain, M. J. (2019). Nest and brood site selection of eastern wild turkeys. *J Wildl Manage* 83, 192–204. doi:<https://doi.org/10.1002/jwmg.21562>.

Wood, J. D., Cohen, B. S., Prebyl, T. J., Conner, L. M., Collier, B. A., and Chamberlain, M. J. (2018). Time-since-fire and stand seral stage affect habitat selection of eastern wild turkeys in a managed longleaf pine ecosystem. *For Ecol Manage* 411, 203–212. doi:[10.1016/j.foreco.2018.01.033](https://doi.org/10.1016/j.foreco.2018.01.033).

Wynecoop, M. D., Morgan, P., Strand, E. K., and Sanchez Trigueros, F. (2019). Getting back to fire suméŝ: exploring a multi-disciplinary approach to incorporating traditional knowledge into fuels treatments. *fire ecol* 15, 17. doi:[10.1186/s42408-019-0030-3](https://doi.org/10.1186/s42408-019-0030-3).

Yeldell, N. A., Cohen, B. S., Prebyl, T. J., Collier, B. A., and Chamberlain, M. J. (2017). Use of pine-dominated forests by female eastern wild turkeys immediately after prescribed fire. *For Ecol Manage* 398, 226–234. doi:[10.1016/j.foreco.2017.05.003](https://doi.org/10.1016/j.foreco.2017.05.003).

Zachmann, L. J., Shaw, D. W. H., and Dickson, B. G. (2018). Prescribed fire and natural recovery produce similar long-term patterns of change in forest structure in the Lake Tahoe basin, California. *For Ecol Manage* 409, 276–287. doi:[10.1016/j.foreco.2017.11.013](https://doi.org/10.1016/j.foreco.2017.11.013).

Zhang, M., Wang, W., Wang, D., Heenan, M., and Xu, Z. (2018). Short-term responses of soil nitrogen mineralization, nitrification and denitrification to prescribed burning in a suburban forest ecosystem of subtropical Australia. *Sci Total Environ* 642, 879–886. doi:[10.1016/j.scitotenv.2018.06.144](https://doi.org/10.1016/j.scitotenv.2018.06.144).

Zuloaga-Aguilar, S., Orozco-Segovia, A., Briones, O., and Pelaez, E. J. (2016). Response of soil seed bank to a prescribed burning in a subtropical pine–oak forest. *Int. J. Wildland Fire* 25, 946. doi:[10.1071/WF15194](https://doi.org/10.1071/WF15194).
